# Supplementary material for: BMAL1 facilitates trophoblast migration and invasion via SP1-DNMT1/DAB2IP pathway in recurrent spontaneous abortion
Source: PubMed Central journal article supplement (PMC5685683; doi:10.18632/oncotarget.20702), 2017-09-07
Supplement: oncotarget-08-89451-s001.pdf [file oncotarget-08-89451-s001.pdf]

## BMAL1 facilitates trophoblast migration and invasion via SP1-DNMT1/DAB2IP pathway in recurrent spontaneous abortion

### SUPPLEMENTARY MATERIALS

**Supplementary Table 1. Clinical information of patients**

| Subject               | Induced Abortion<br>(IA, mean $\pm$ S.D.,<br>n = 50) | Sporadic Abortion<br>(SA, mean $\pm$ S.D.,<br>n = 38) | Recurrent<br>Spontaneous<br>Abortion<br>(RSA, mean $\pm$ S.D.,<br>n = 11) |
|-----------------------|------------------------------------------------------|-------------------------------------------------------|---------------------------------------------------------------------------|
| Age (years)           | 26.62 $\pm$ 5.61                                     | 28.10 $\pm$ 5.22                                      | 29.55 $\pm$ 4.44                                                          |
| Gestation age (weeks) | 7.92 $\pm$ 2.09                                      | 8.83 $\pm$ 2.26                                       | 8.54 $\pm$ 2.91                                                           |
| Number of abortions   | 0.36 $\pm$ 0.64                                      | 1.45 $\pm$ 0.50                                       | 3.91 $\pm$ 0.79                                                           |
| Parental chromosomes  | Not detected                                         | No identification of<br>chromosomal<br>abnormalities  | No identification of<br>chromosomal<br>abnormalities                      |
| Fetal chromosome      | Not detected                                         | Not detected                                          | No identification of<br>chromosomal<br>abnormalities                      |

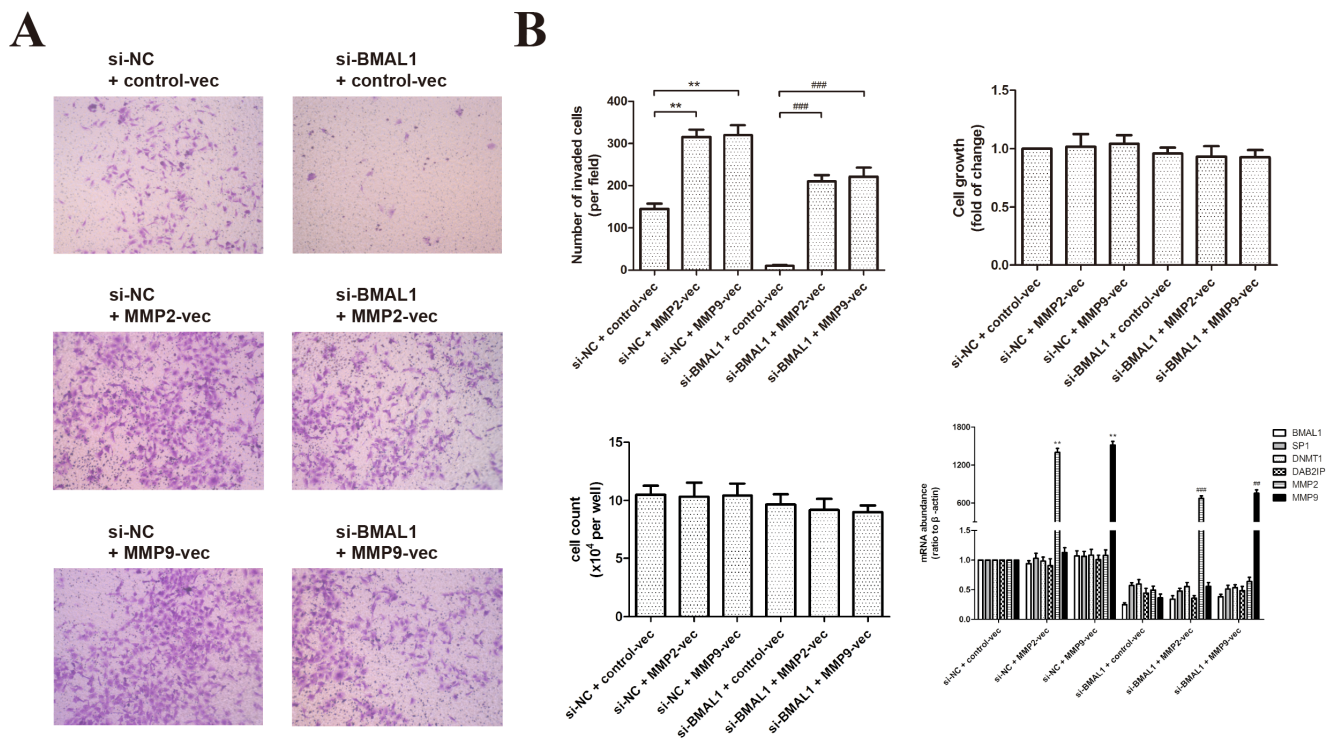

**Supplementary Figure 1: BMAL1 induced migration and invasion of HTR-8/SVneo cells via MMP2 and MMP9.** (A) Representative images of transwell assay after *BMAL1* knock-down and further *MMP2* or *MMP9* over-expression (magnification: 100 ×). (B) The top panel from left to right is the statistic result of invaded cells and the statistic result of MTT. The bottom panel from left to right is the cell count and the mRNA abundance of *BMAL1*, *SP1*, *DNMT1*, *DAB2IP*, *MMP2* and *MMP9* after *BMAL1* knock-down and further *MMP2* or *MMP9* over-expression. Images are representative, and data are means ± SEM from three experiments. \*  $P < 0.05$ , \*\*  $P < 0.01$ , \*\*\*  $P < 0.001$  against si-NC + control-vec cells; #  $P < 0.05$ , ##  $P < 0.01$ , ###  $P < 0.001$  against si-BMAL1 + control-vec cells.
